# Supplementary material for: Monitoring Risk: Tick and Borrelia burgdorferi Public Participatory Surveillance in the Canadian Maritimes, 2012–2020
Source: MDPI journal article supplement (doi:10.3390/pathogens10101284), 2021-10-06
Supplement: s1 [file s1]

A

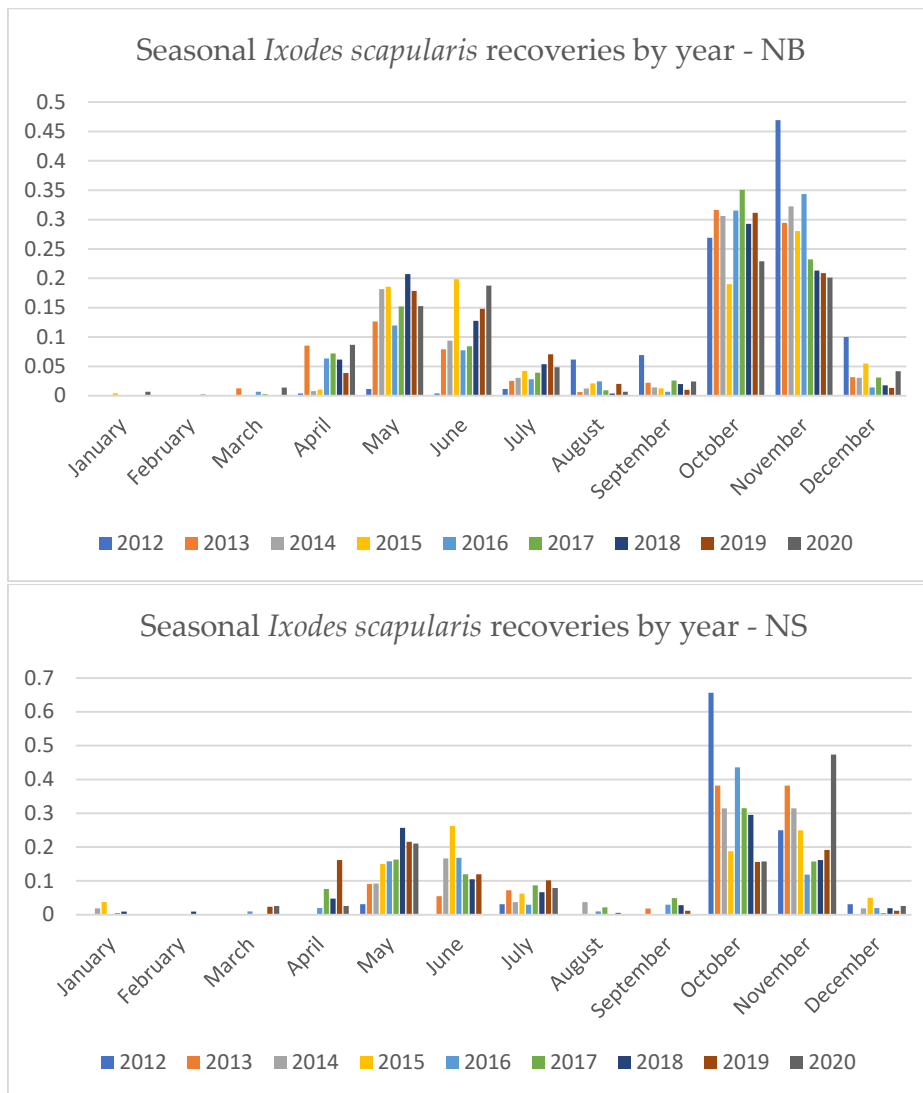

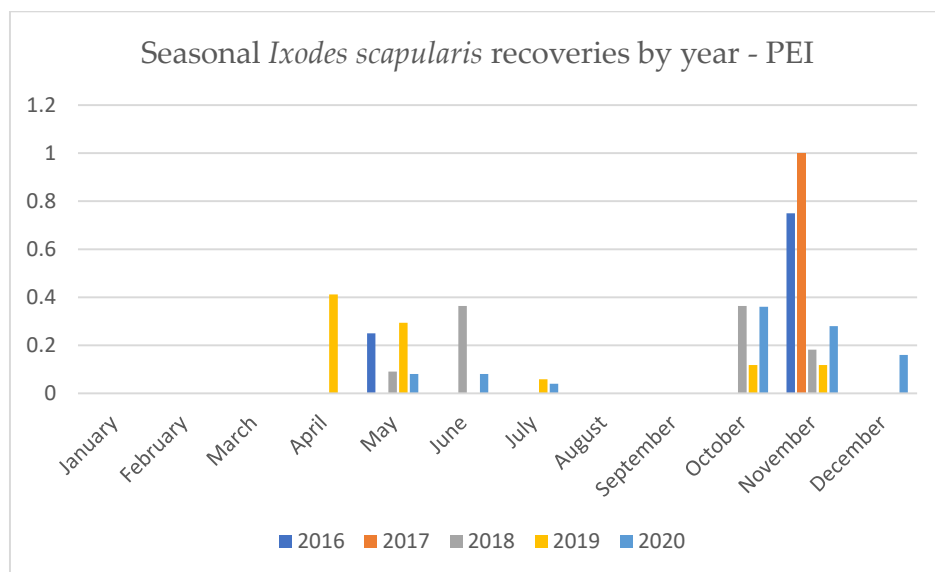

B

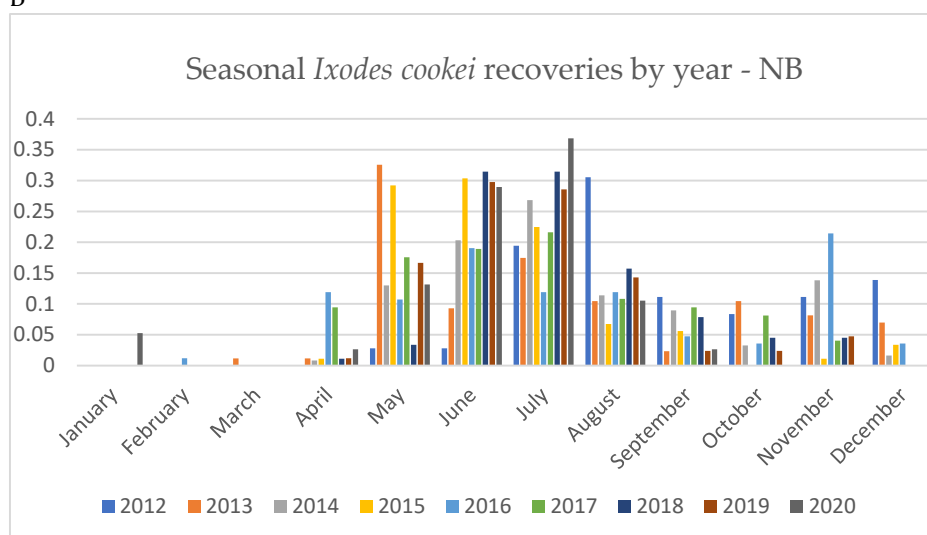

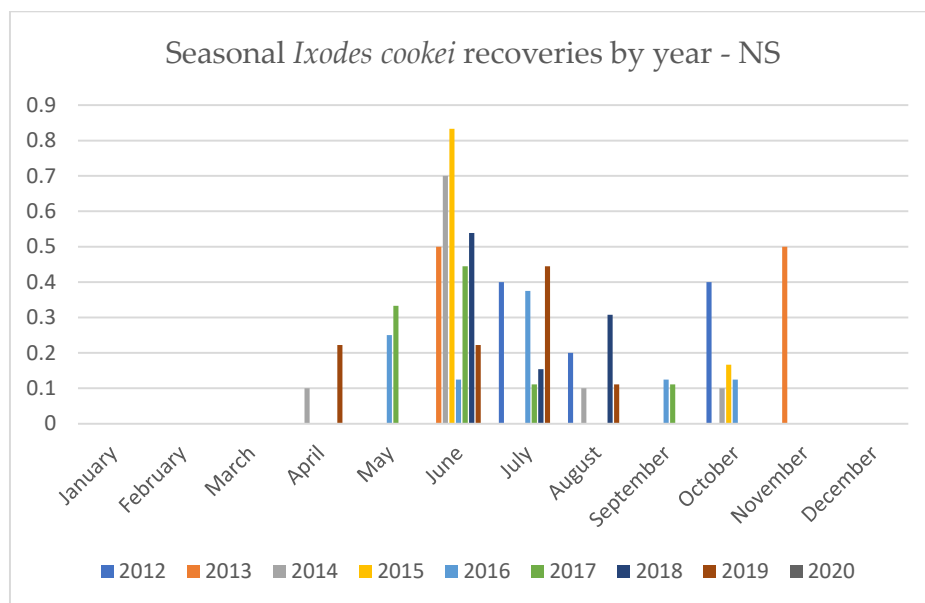

C.

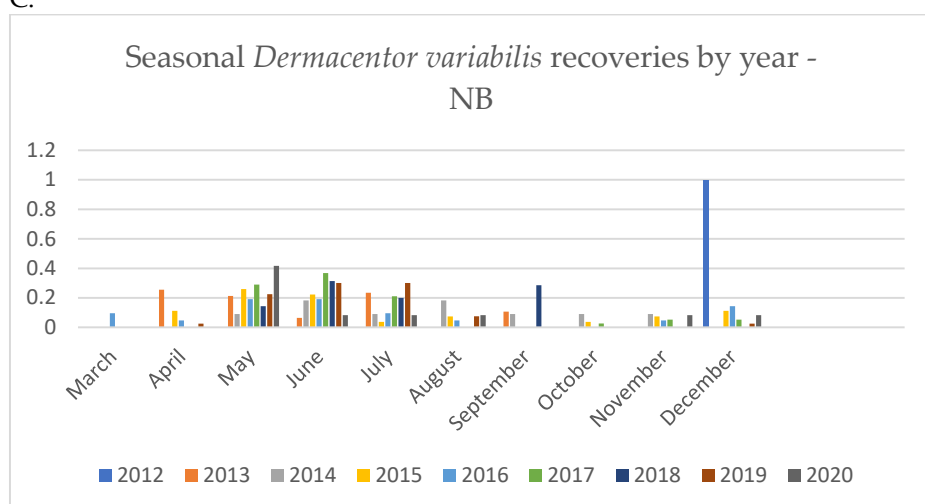

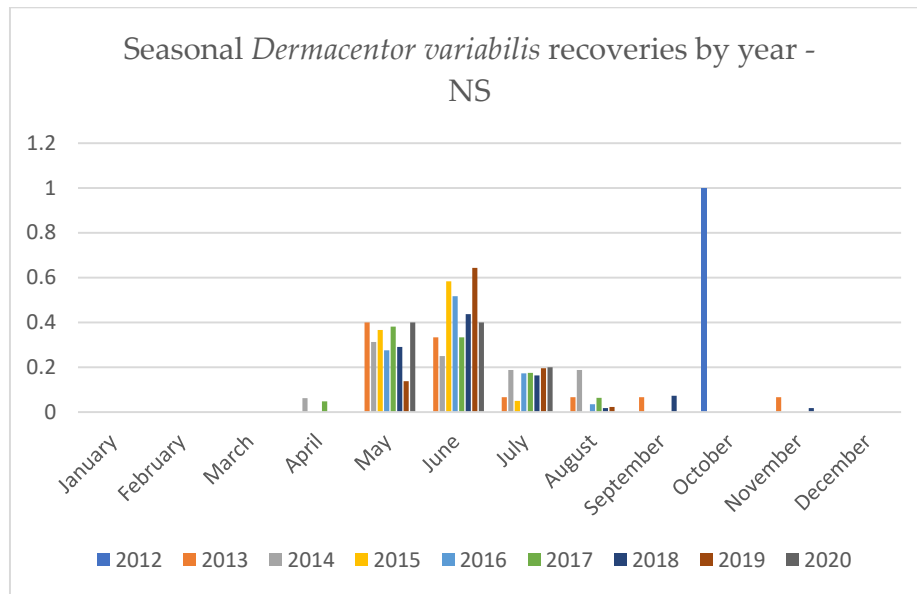

**Supplemental Figure S1.** Seasonal recoveries of *Ixodes scapularis* (A), *Ixodes cookei* (B) and *Dermacentor variabilis* (C) in New Brunswick (NB), Nova Scotia (NS) and Prince Edward Island (PEI). The proportion of the annual tick submissions, per province, is shown by month of collection. Insufficient *Ixodes cookei* and *Dermacentor variabilis* were recovered from Prince Edward Island for comparison.
